# Supplementary material for: Discovery of benzochalcone derivative as a potential antigastric cancer agent targeting signal transducer and activator of transcription 3 (STAT3)
Source: PubMed Central journal article supplement (PMC9297716; doi:10.1080/14756366.2022.2100366), 2022-07-18

# Supplementary Material

## Table of Contents

<sup>1</sup>H-NMR Spectra, <sup>13</sup>C-NMR Spectra and HRMS Spectra of Title Compounds

(E)-1-(1-hydroxy-4,5,8-trimethoxynaphthalen-2-yl)-3-phenylprop-2-en-1-one (**9a**)

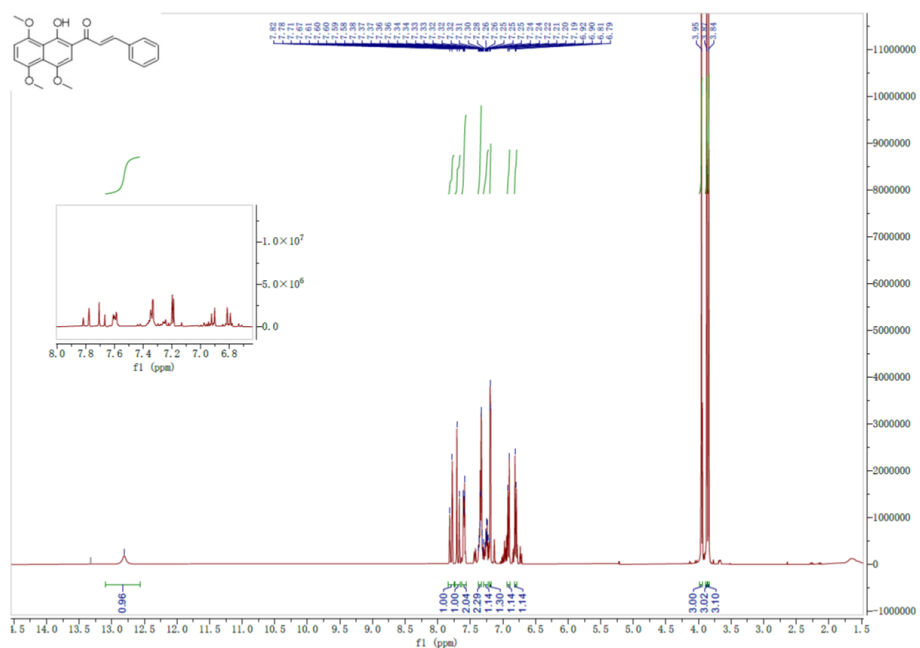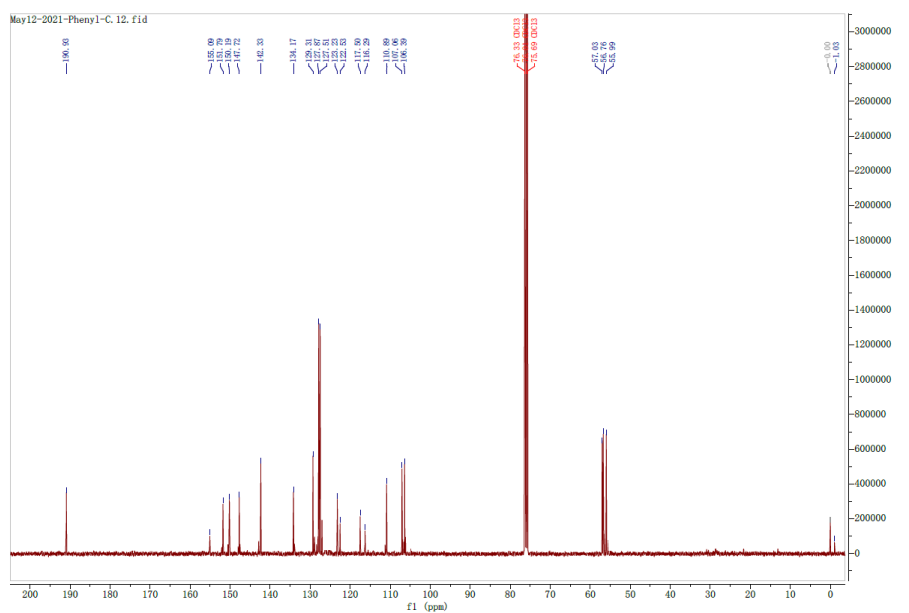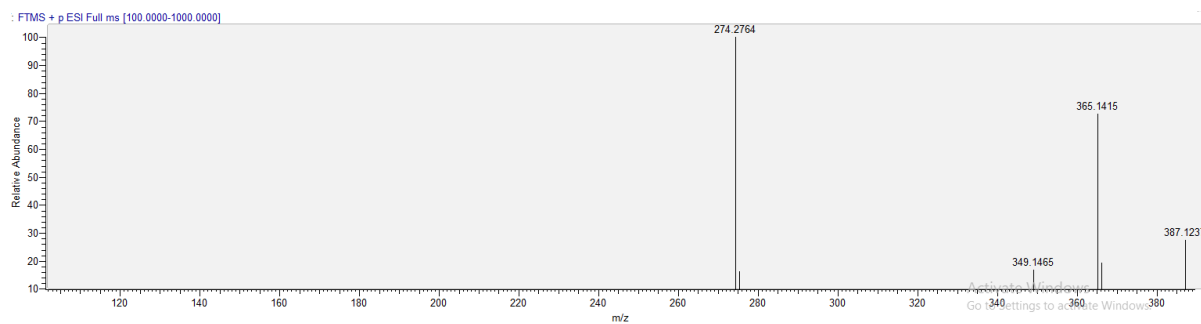







(E)-1-(1-hydroxy-4,5,8-trimethoxynaphthalen-2-yl)-3-(4-morpholinophenyl)prop-2-en-1-one (9e)

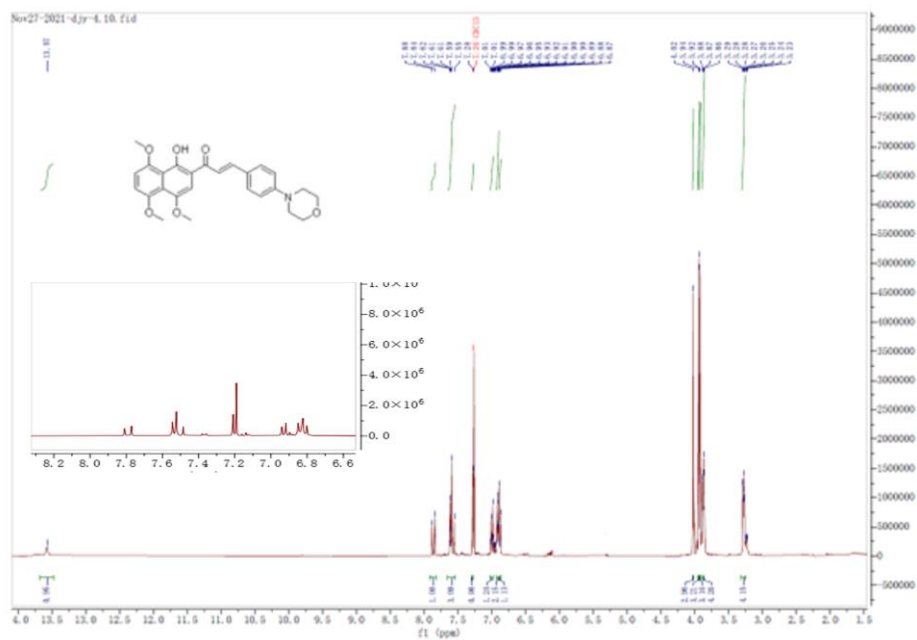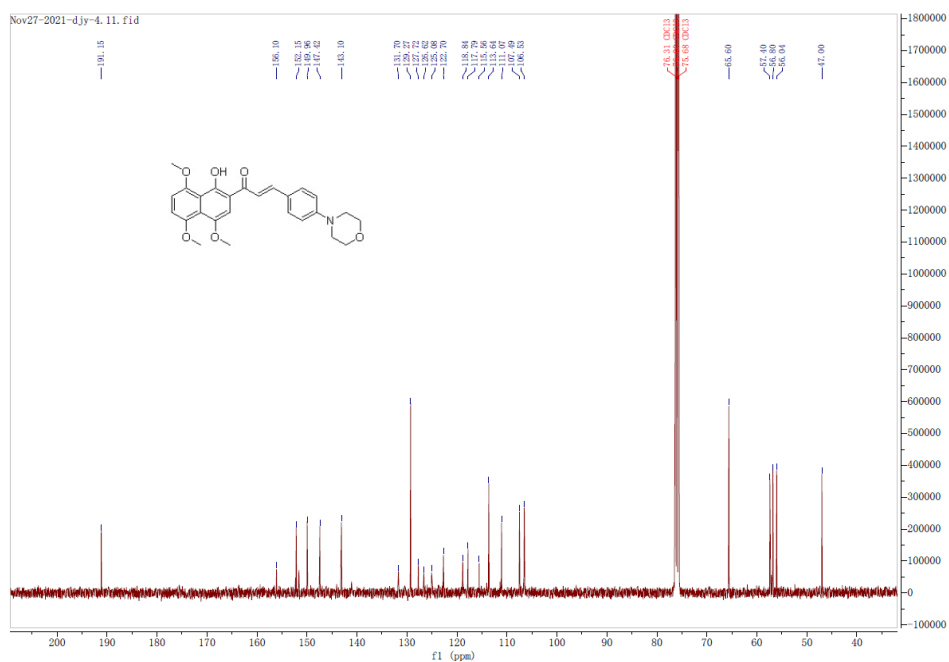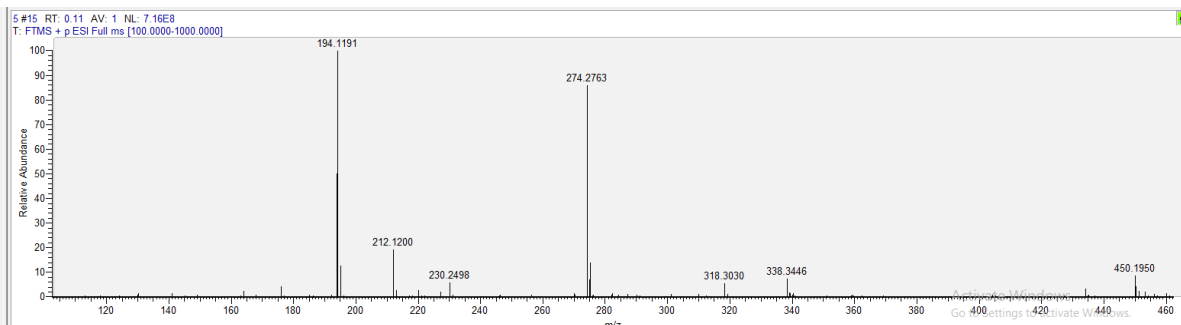

(E)-1-(1-hydroxy-4,5,8-trimethoxynaphthalen-2-yl)-3-(3-morpholinophenyl)prop-2-en-1-one (9f)

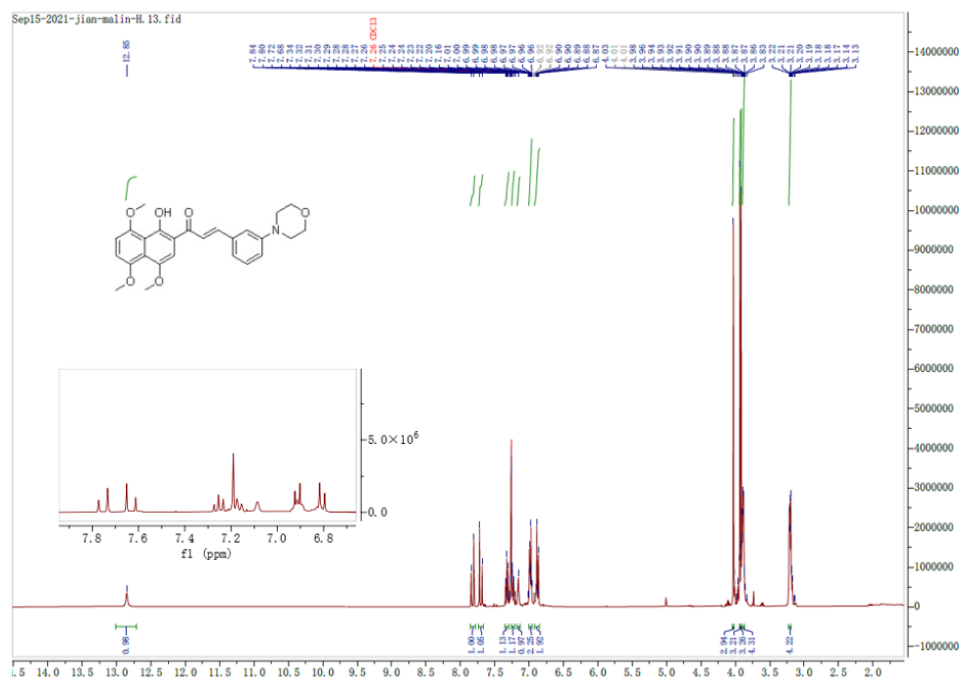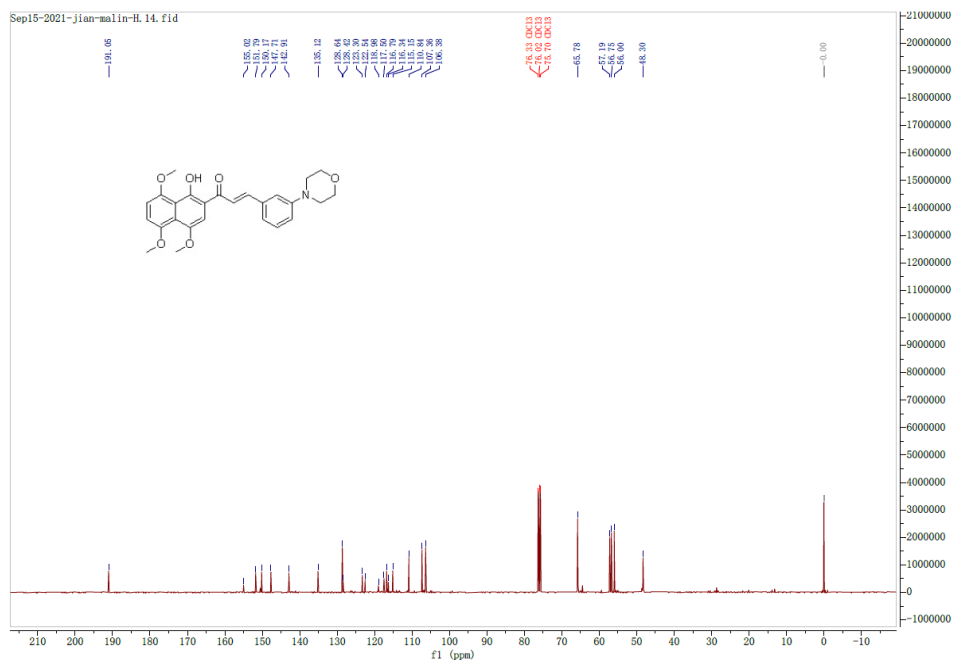

(E)-1-(1-hydroxy-4,5,8-trimethoxynaphthalen-2-yl)-3-(2-morpholinophenyl)prop-2-en-1-one (**9g**)

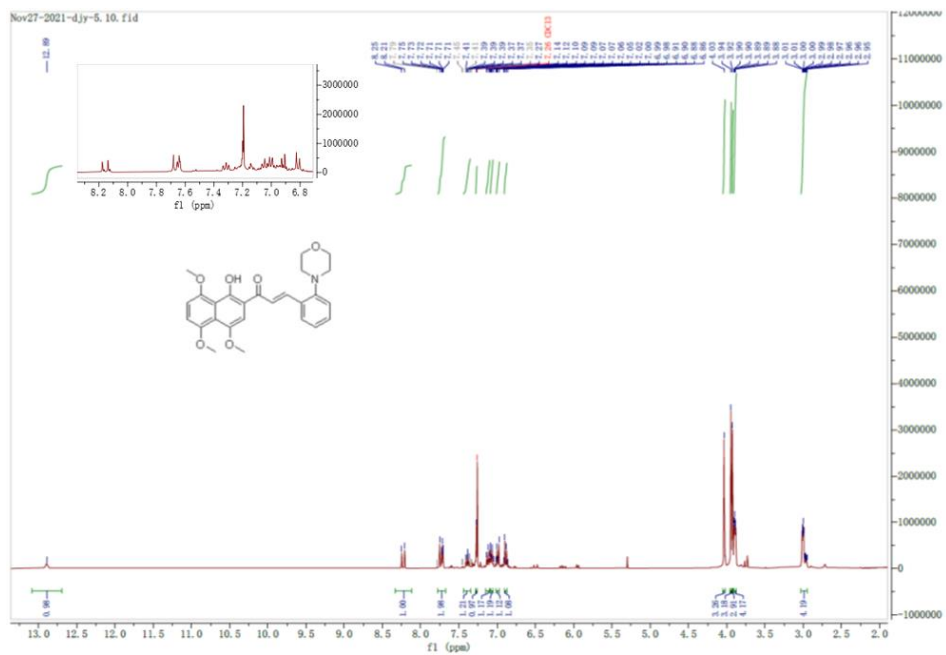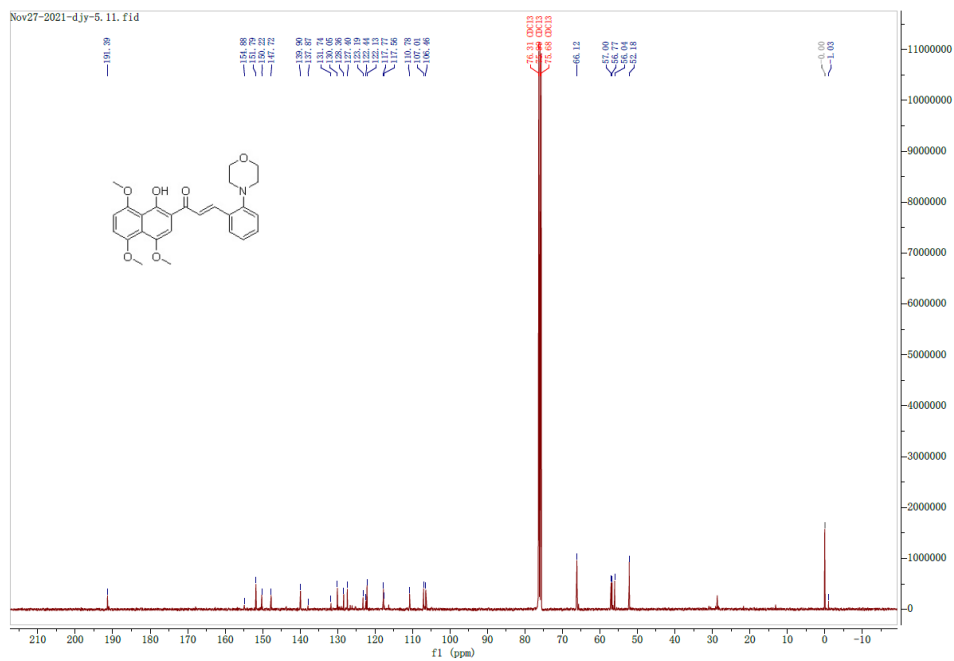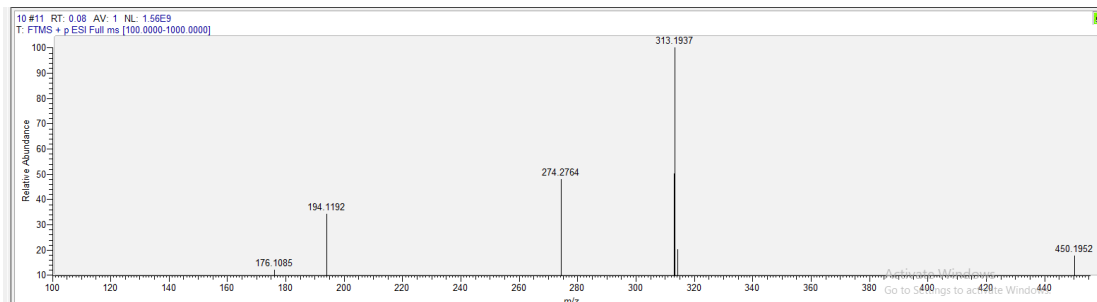



(E)-1-(1-hydroxy-4,5,8-trimethoxynaphthalen-2-yl)-3-(2-(4-methylpiperazin-1-yl)phenyl)prop-2-en-1-one (9h)

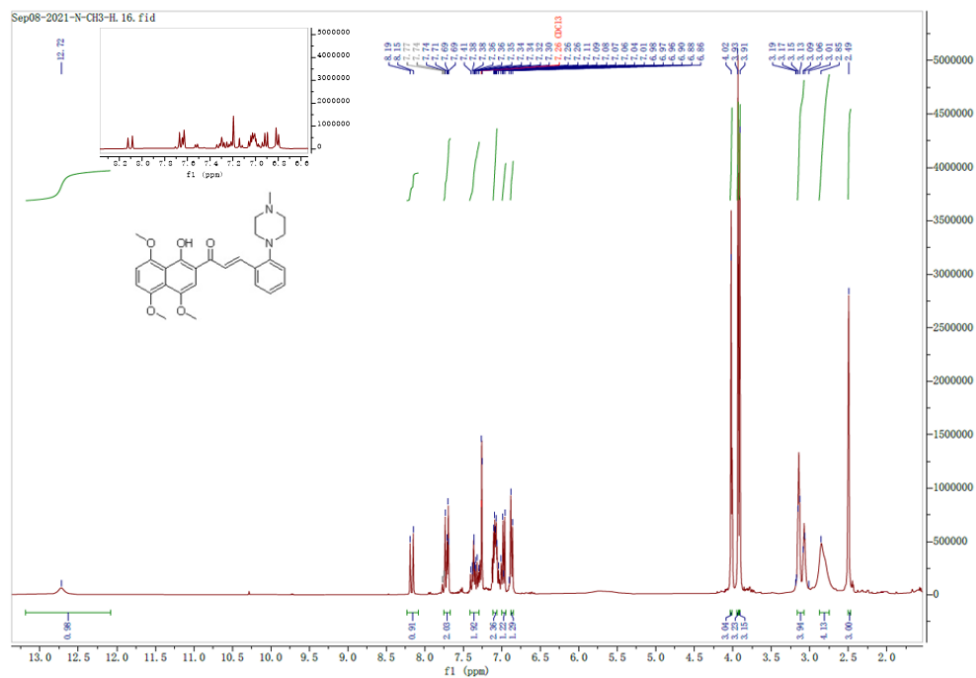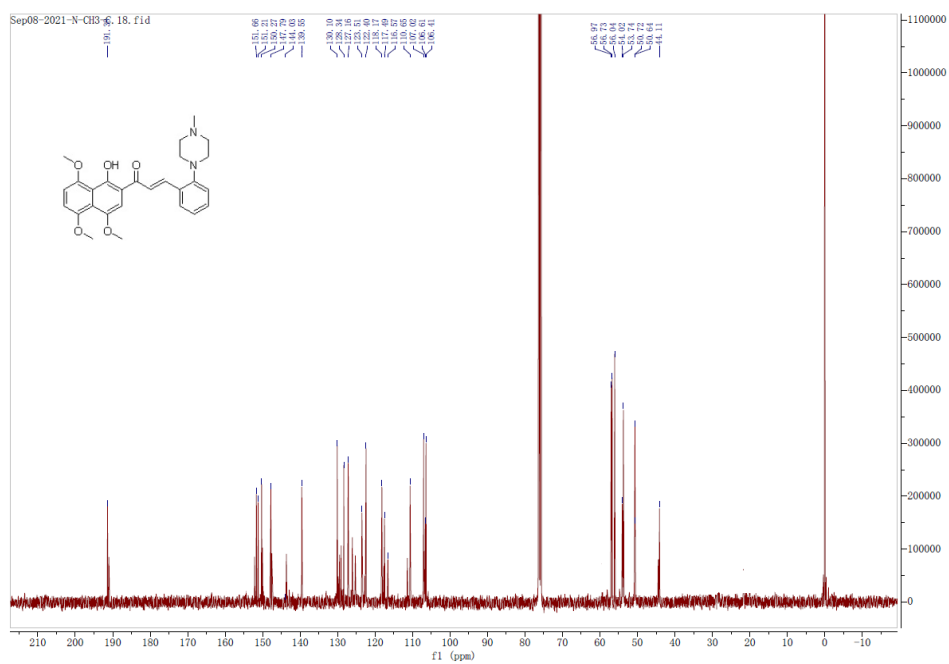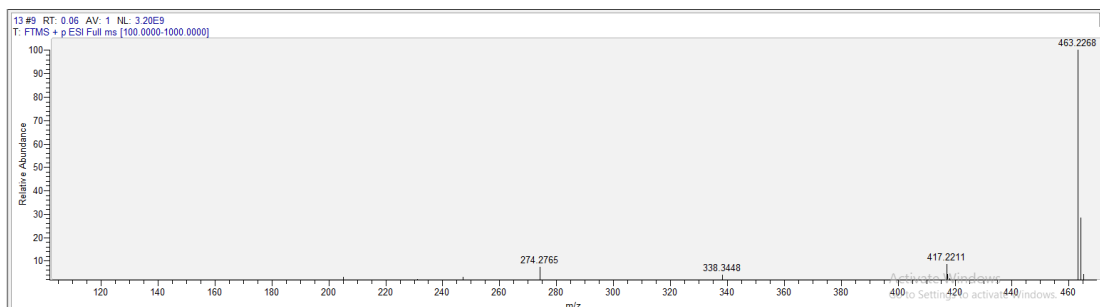

(*E*)-3-(4-(1,1-dioxidothiomorpholino)phenyl)-1-(1-hydroxy-4,5,8-trimethoxynaphthalen-2-yl)prop-2-en-1-one (**9i**)

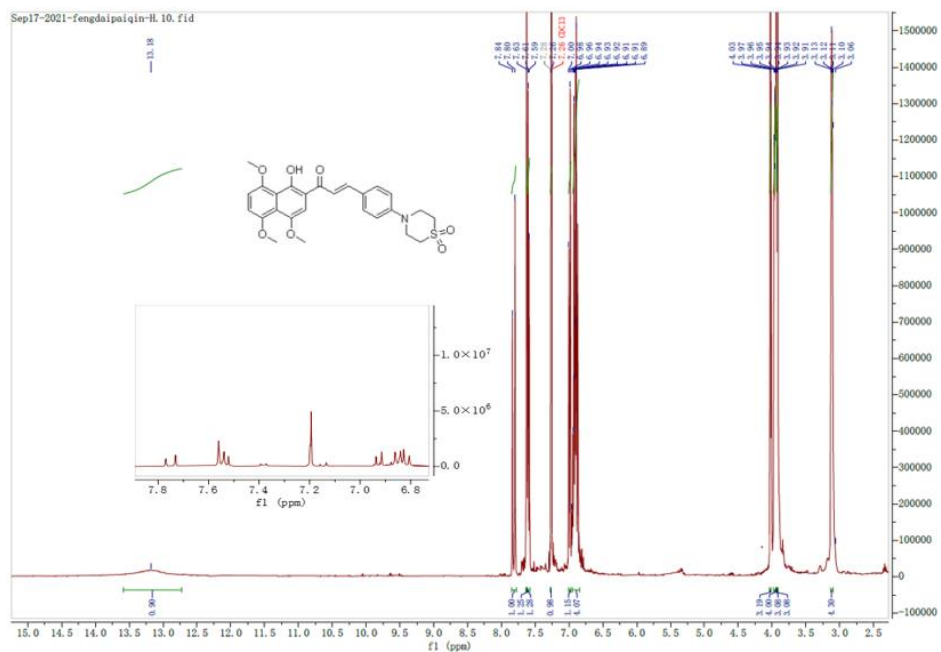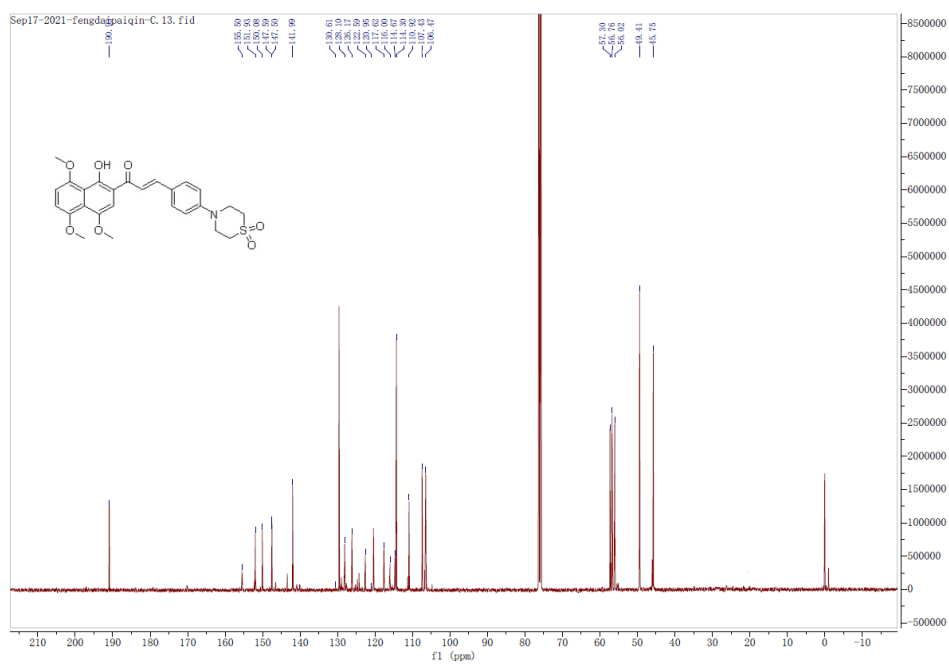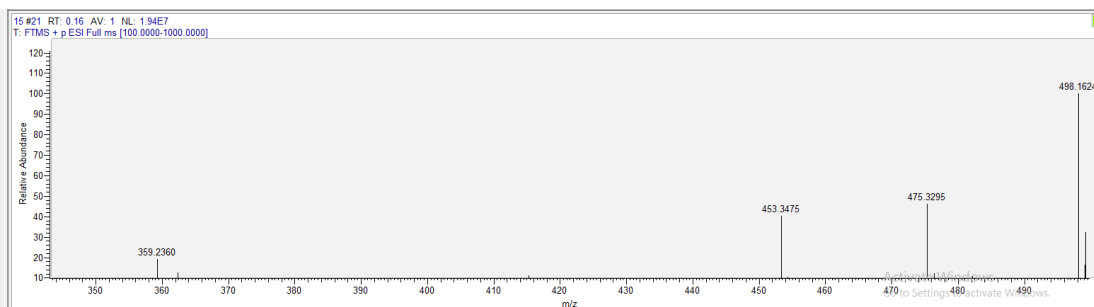

(E)-1-(1-hydroxy-4,5,8-trimethoxynaphthalen-2-yl)-3-(4-(pyridin-4-yl)phenyl)prop-2-en-1-one (9j)

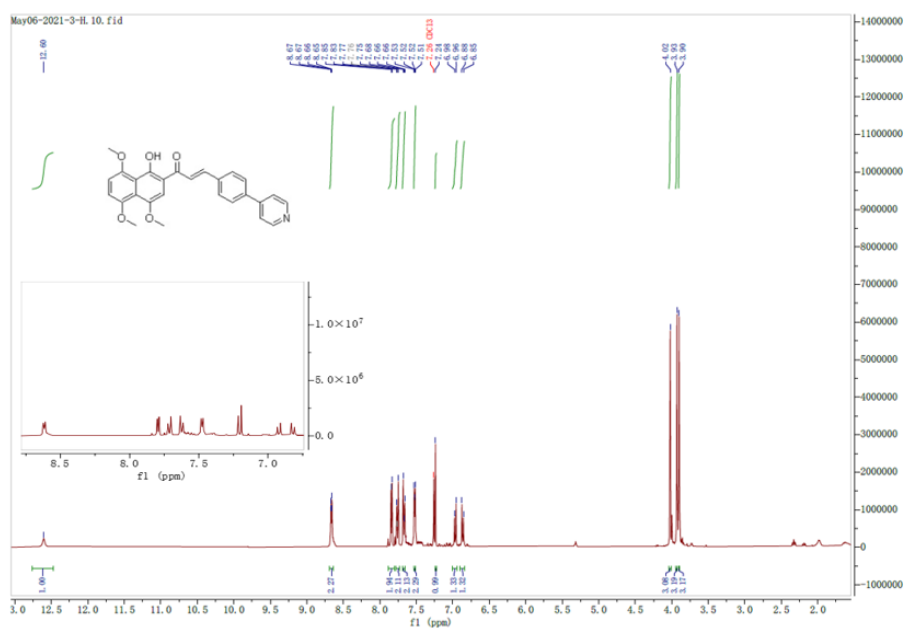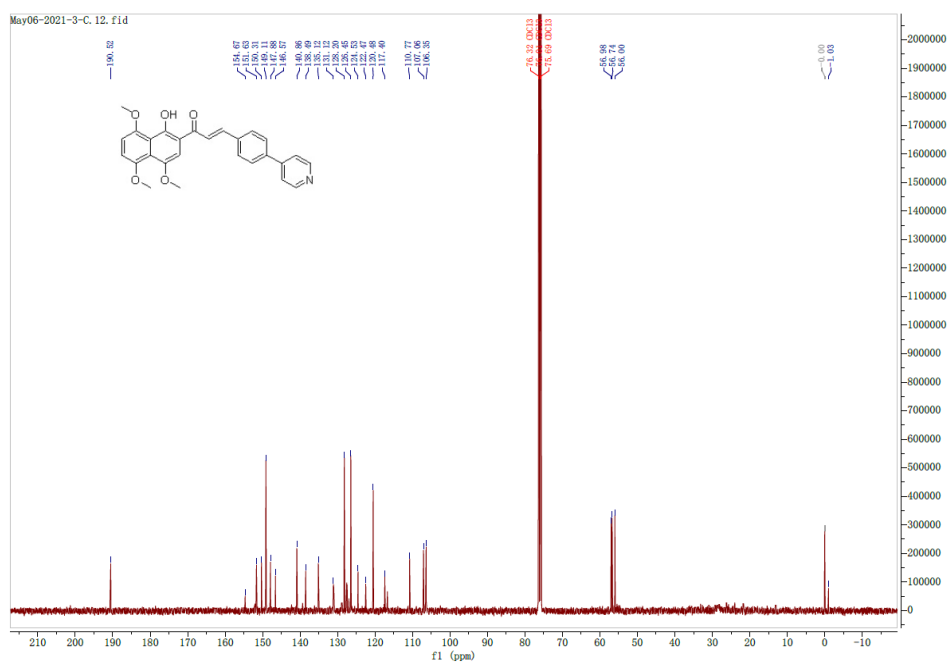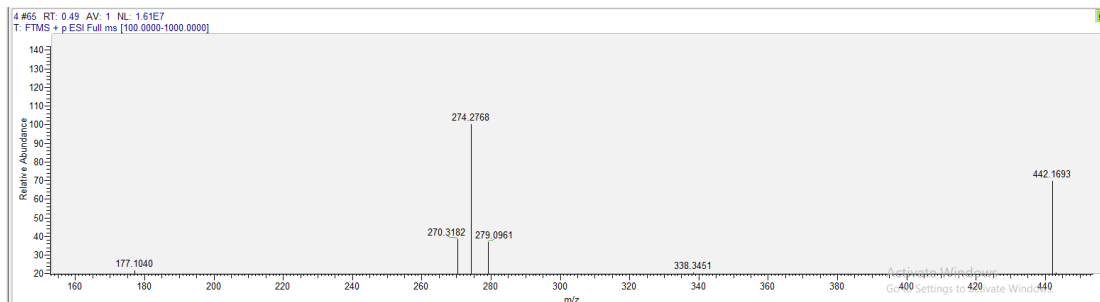



(E)-1-(1-hydroxy-4,5,8-trimethoxynaphthalen-2-yl)-3-(2-(pyridin-4-yl)phenyl)prop-2-en-1-one (91)

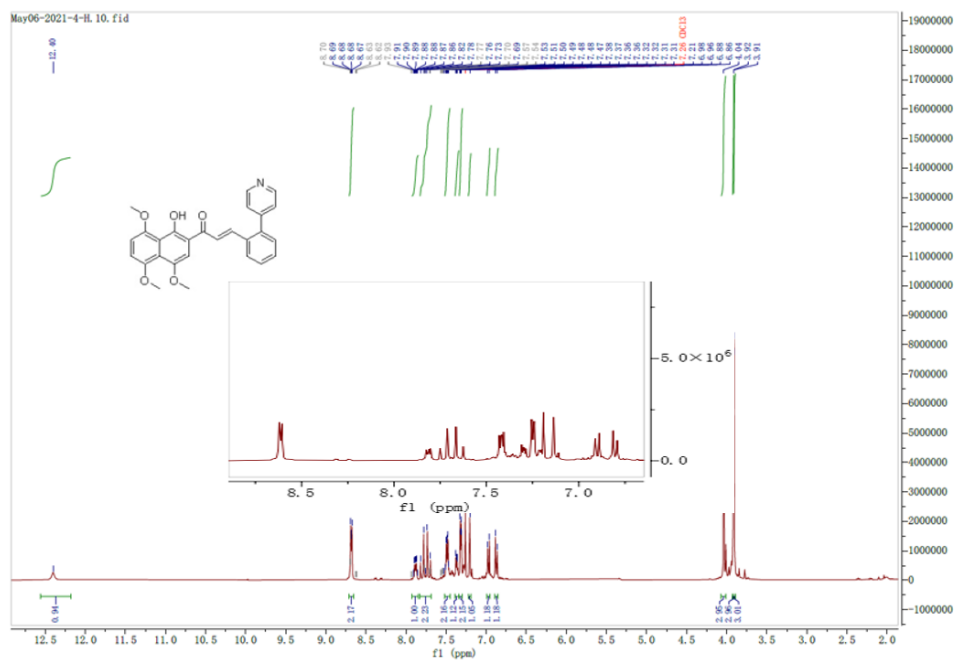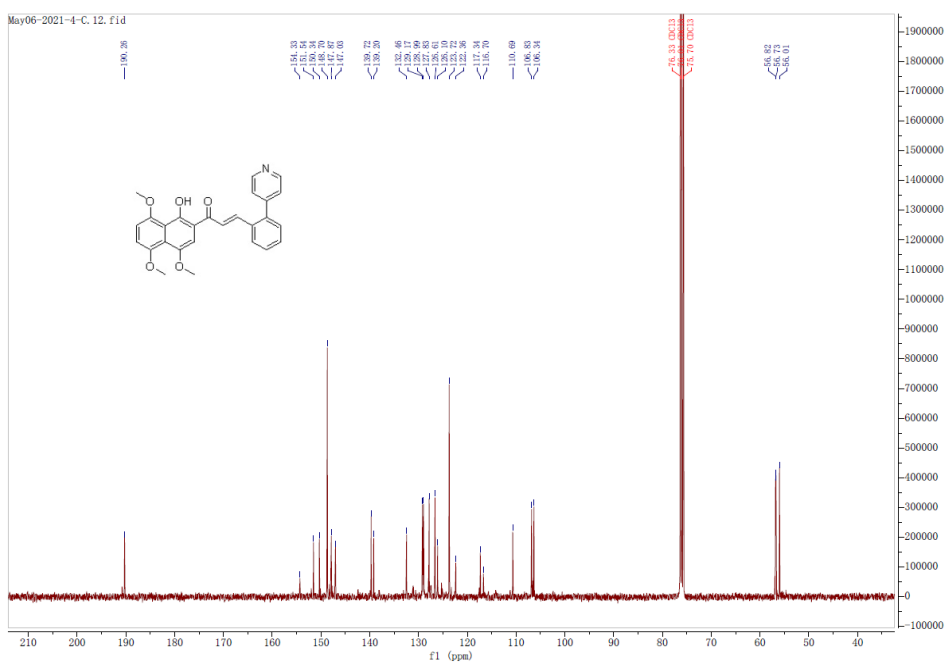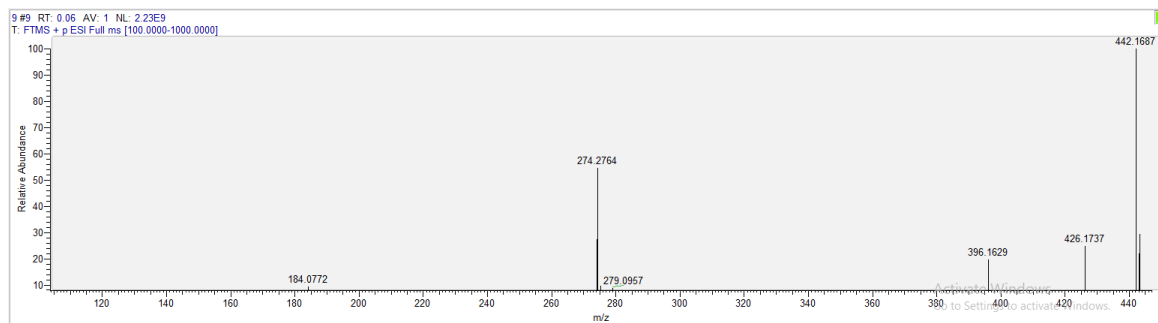

(E)-1-(1-hydroxy-4,5,8-trimethoxynaphthalen-2-yl)-3-(pyridin-2-yl)prop-2-en-1-one (**9m**)

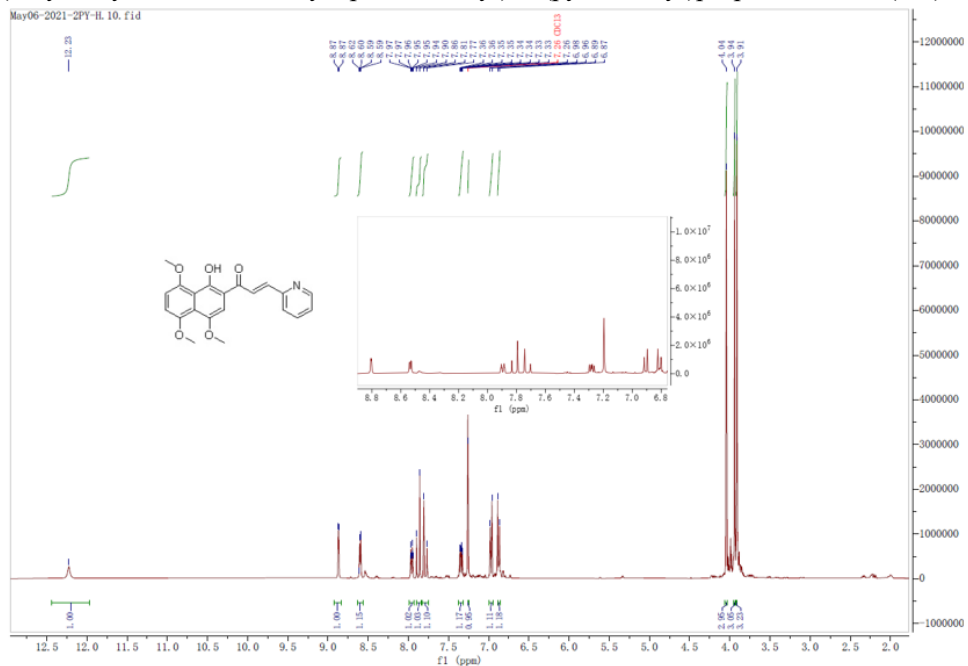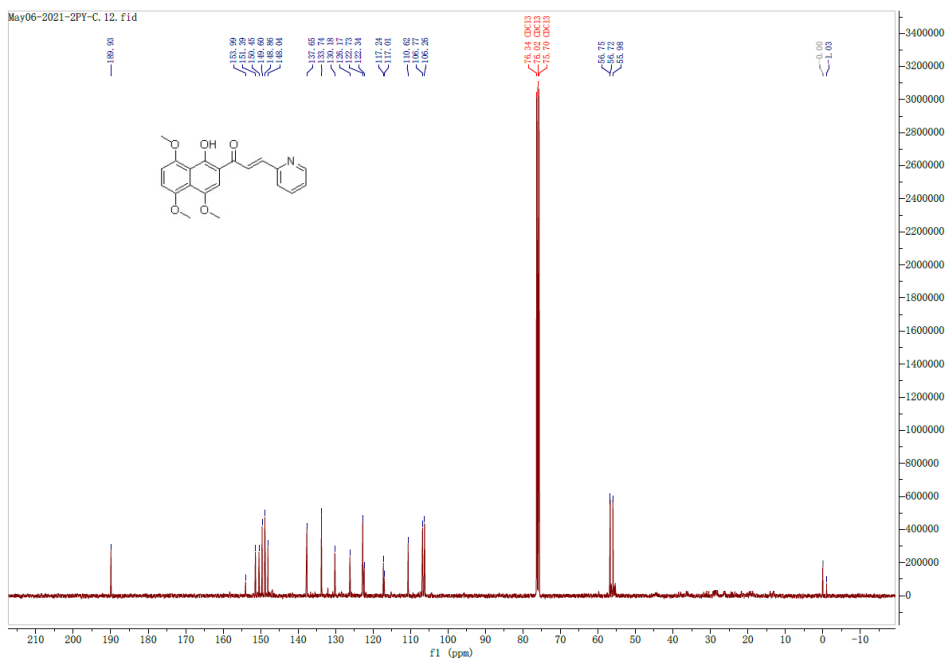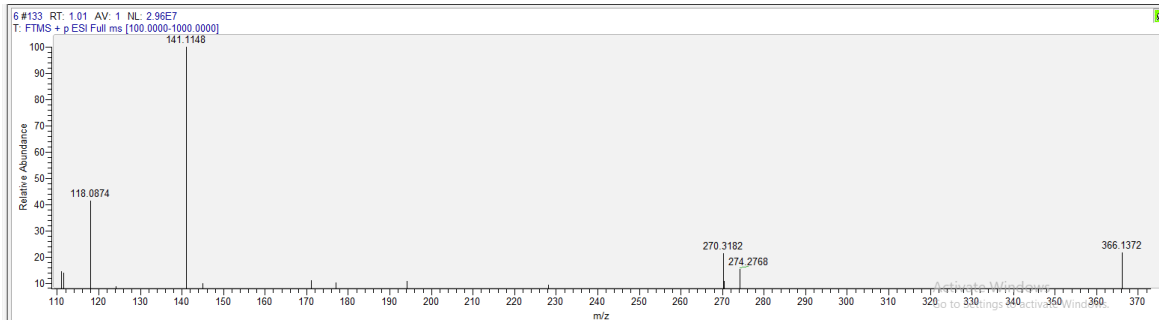

(E)-1-(1-hydroxy-4,5,8-trimethoxynaphthalen-2-yl)-3-(5-methoxypyridin-2-yl)prop-2-en-1-one  
(9n)

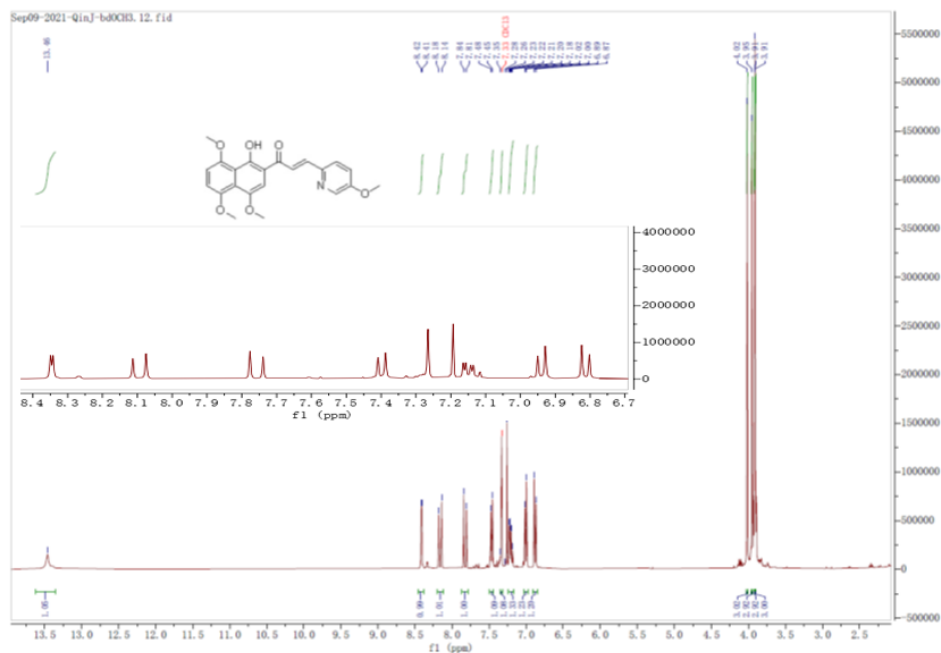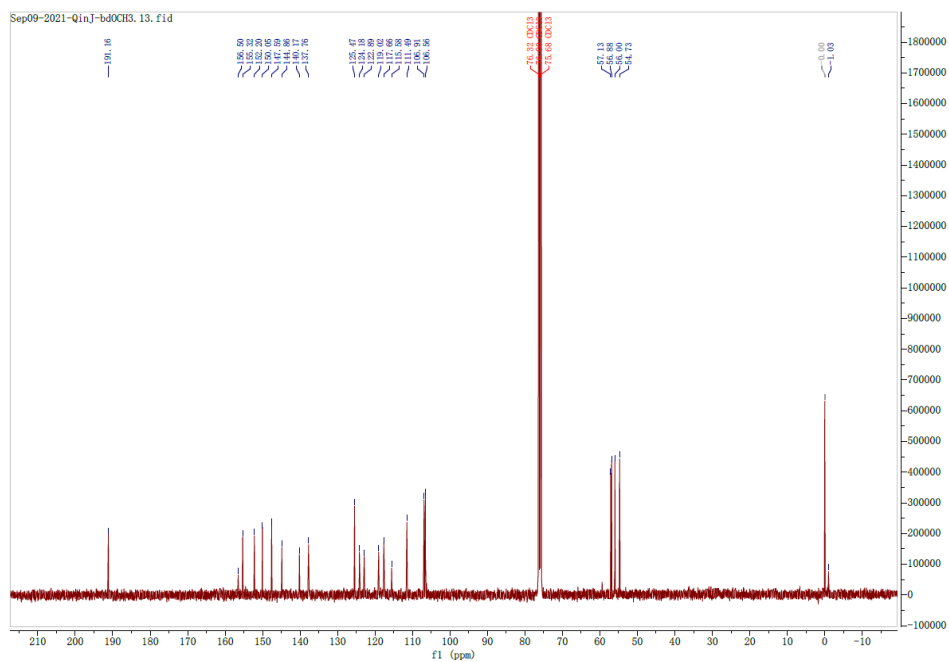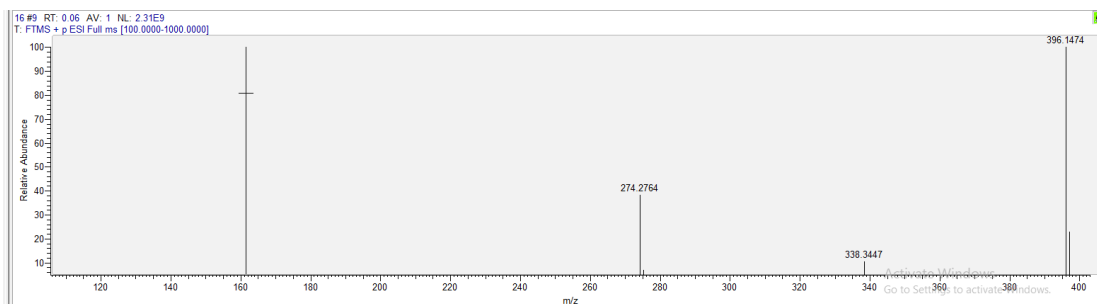







(E)-1-(1-hydroxy-4,5,8-trimethoxynaphthalen-2-yl)-3-(quinolin-7-yl)prop-2-en-1-one (**9q**)

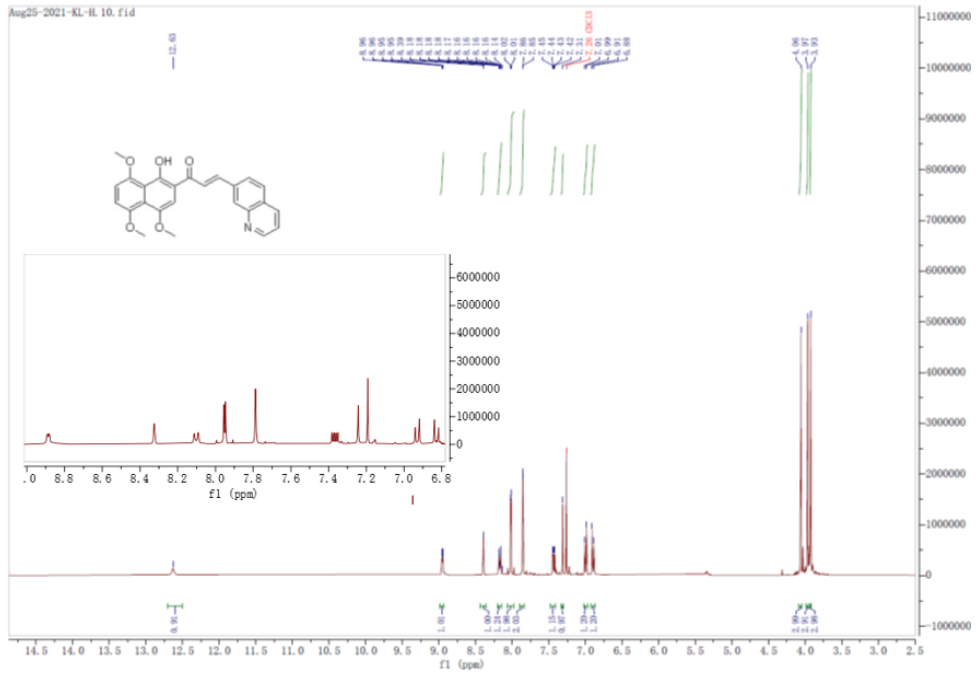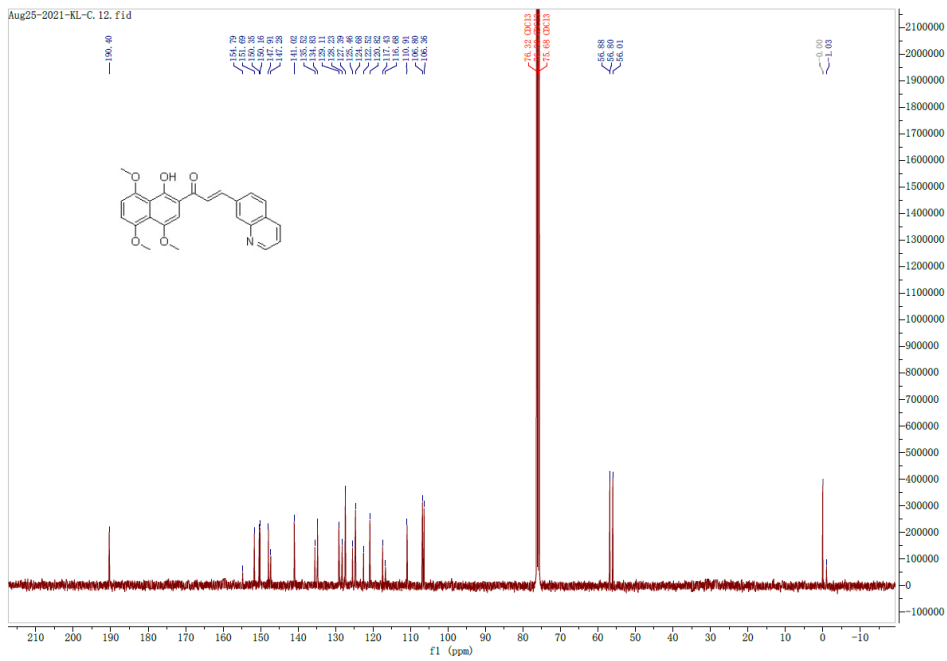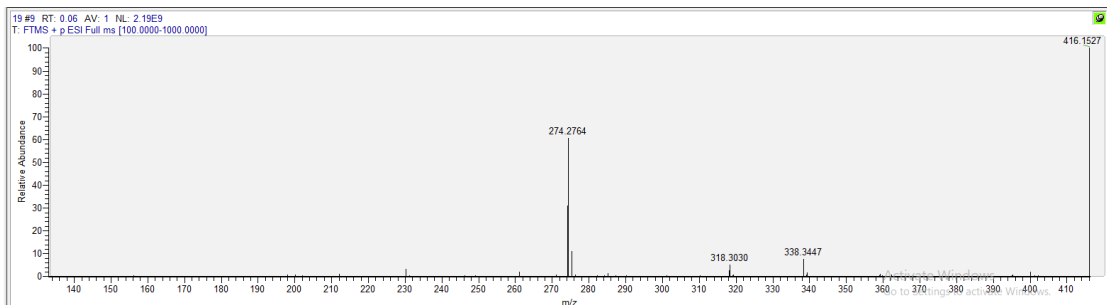

(E)-1-(1-hydroxy-4,5,8-trimethoxynaphthalen-2-yl)-3-(quinolin-3-yl)prop-2-en-1-one (**9r**)

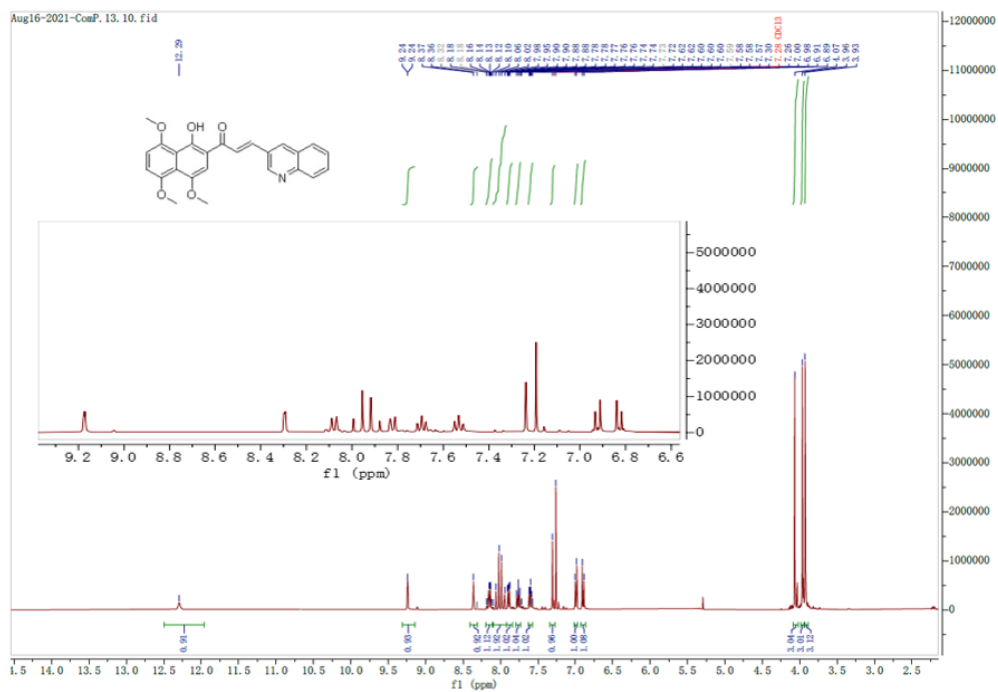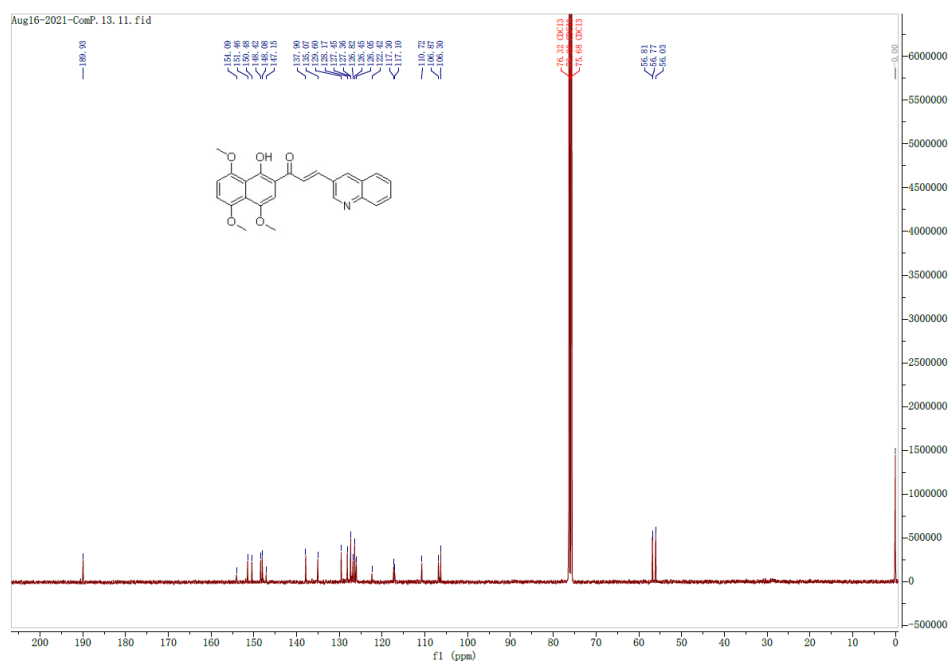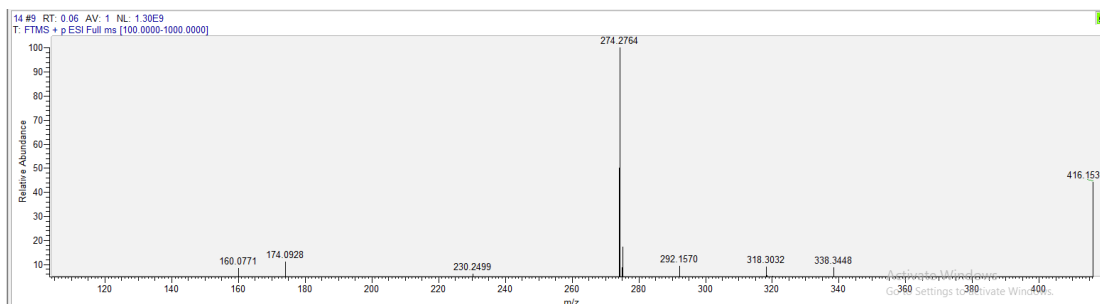

(E)-1-(1-hydroxy-4,5,8-trimethoxynaphthalen-2-yl)-3-(quinolin-5-yl)prop-2-en-1-one (**9s**)

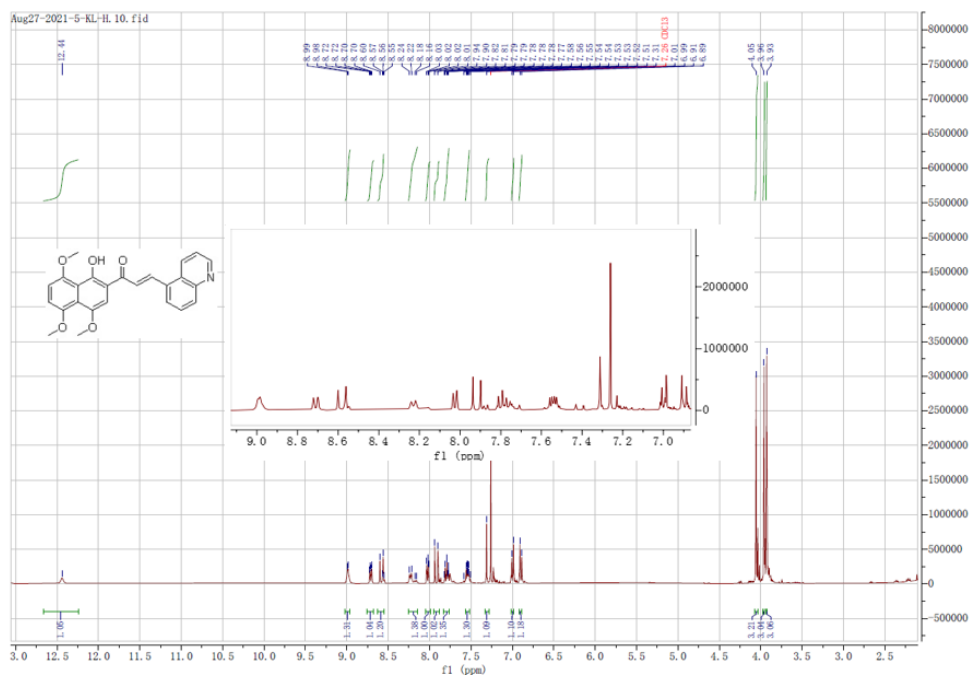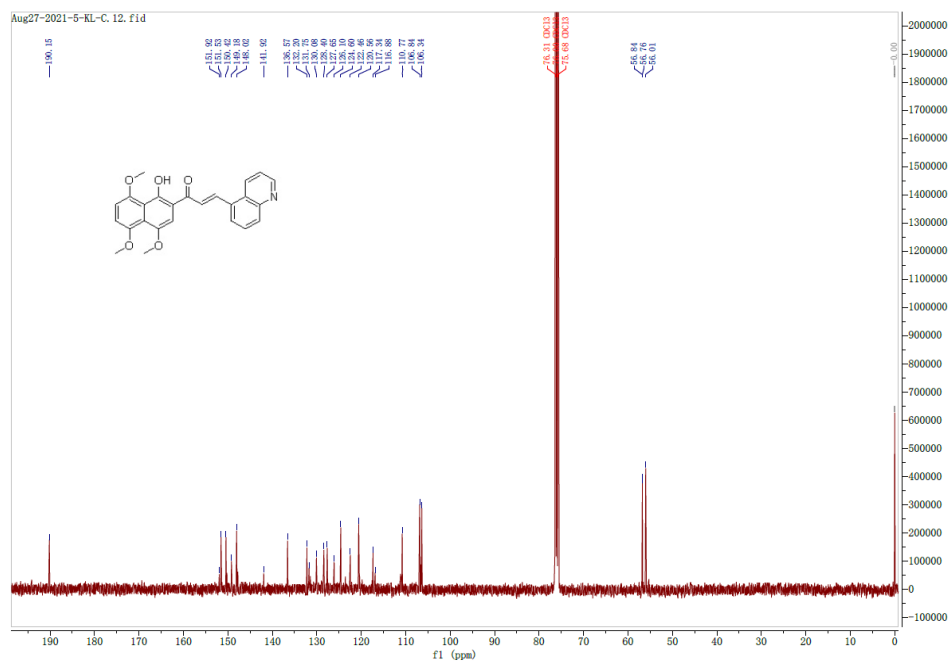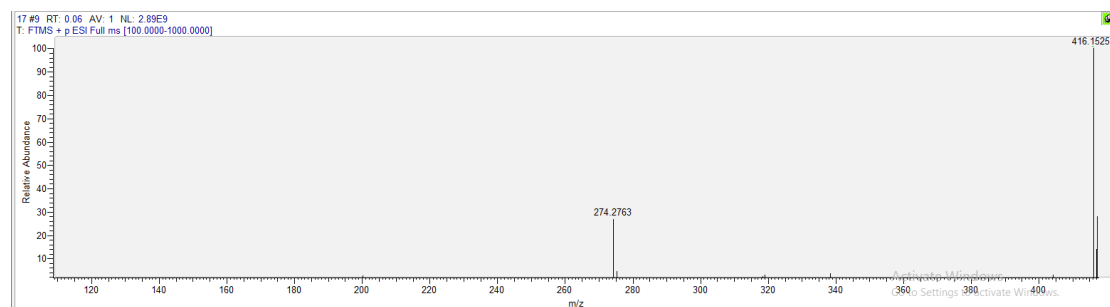

(E)-1-(1-hydroxy-4,5,8-trimethoxynaphthalen-2-yl)-3-(isoquinolin-5-yl)prop-2-en-1-one (9t)

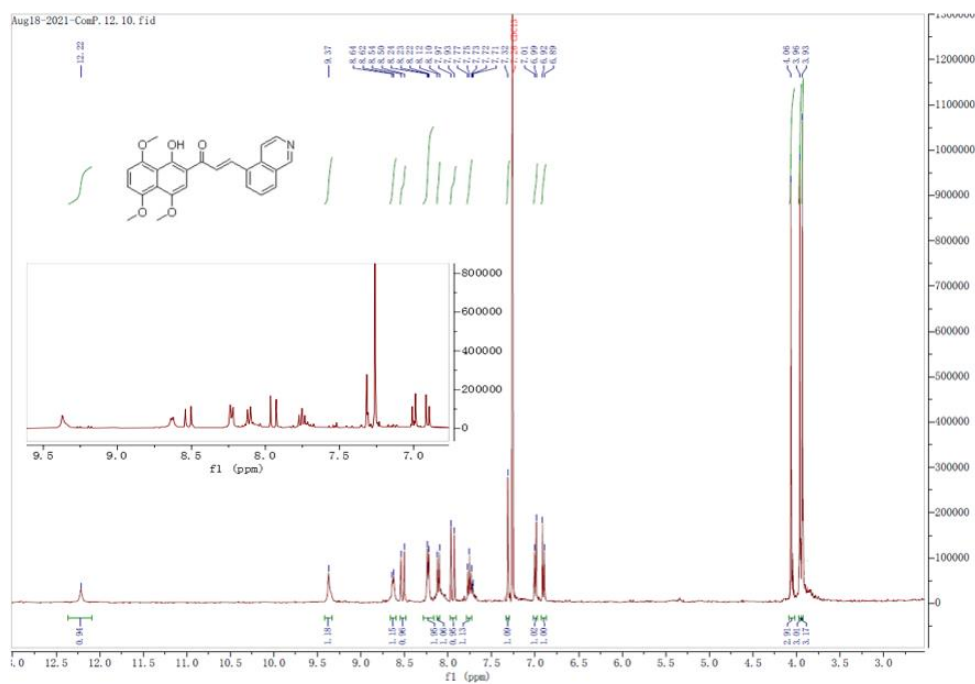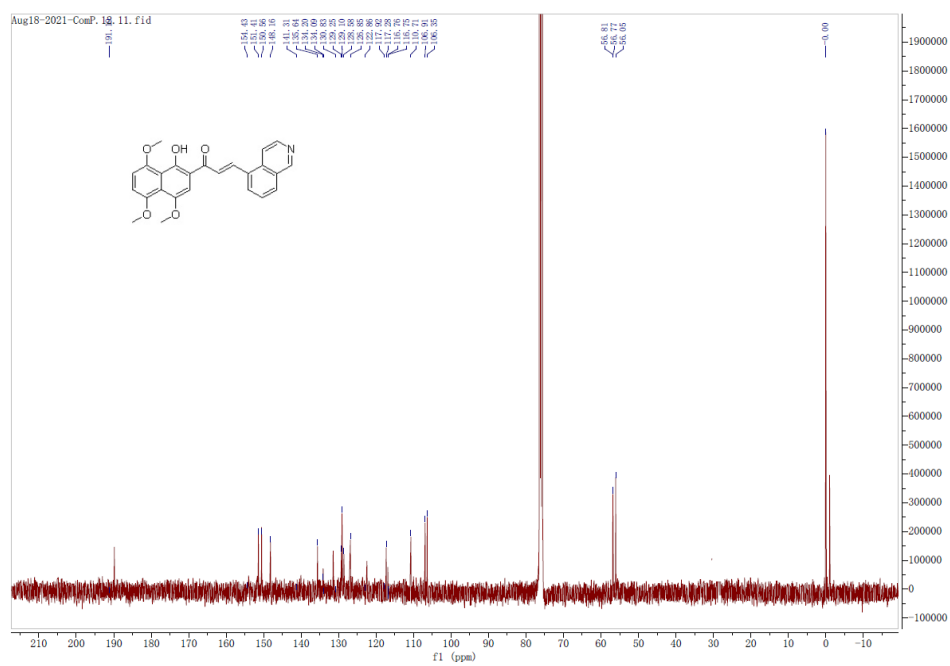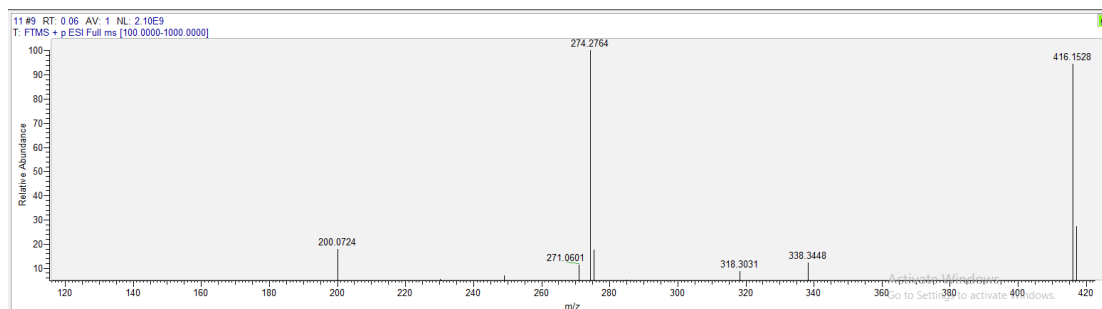

Supplement: IENZ_A_2100366_SM6351.pdf [file IENZ_A_2100366_SM6351.pdf]
